# Supplementary material for: RAFT copolymerization of a phosphorus-containing monomer with α-hydroxy phosphonate and methyl methacrylate
Source: Royal Society of Chemistry journal article supplement (doi:10.1039/c6ra02809h), 2016-01-01
Supplement: c6ra02809h1.pdf [file c6ra02809h1.pdf]

## Electronic Supplementary Information (ESI)

### **RAFT copolymerization of phosphorus-containing monomer with $\alpha$ -hydroxy phosphonate and methyl methacrylate**

Chun Tian, Tianchi Xu, Lifen Zhang,\* Zhenping Cheng\* and Xiulin Zhu

Suzhou key Laboratory of Macromolecular Design and Precision Synthesis, Jiangsu Key Laboratory of Advanced Functional Polymer Design and Application, Department of Polymer Science and Engineering, College of Chemistry, Chemical Engineering and Materials Science, Soochow University, Suzhou 215123, China

#### **Synthesis of 2-cyanoprop-2-yl dithionaphthalenoate(CPDN)**

As shown in Scheme 2, CPDN was prepared according to the method.<sup>1</sup> A solution including 22.5 g of (0.11 mol) 1-bromonaphthalene and 90 mL of THF was added to a 250 mL bottle containing magnesium (2.88 g, 0.118 mol) within 1 h and refluxed for 1 h. Carbon disulfide (8.36 g, 0.11 mol) was added to the solution at room temperature and refluxed for 8 h. The mixture was poured into water and acidified by diluted hydrochloric acid. The solution was extracted with chloroform (40 mL  $\times$  3). After evaporation under vacuum, the residue was mixed with 18 mL of ethyl acetate and reacted with 4.70 g of DMSO under nitrogen protection for 10 h. The mixture was added with 12.24 g of AIBN and refluxed for another 15 h. After evaporation of the solvent, crude CPDN was obtained. The pure CPDN was obtained as a solid by chromatography on silica gel column with petroleum ester: ethyl acetate = 10:1 as eluant as a dark red

oil (10.5 g, 32.7%) and then kept in the refrigerator at  $-18\text{ }^{\circ}\text{C}$ . HPLC (Waters 515) indicated that the purity is above 95%.  $^1\text{H}$  NMR ( $\text{CDCl}_3$ , 300 MHz):  $\delta = 1.95$  (s, 6H); 7.42 (m, 2H); 7.51 (m, 2H); 7.85 (m, 2H) and 8.10 (m, 1H).

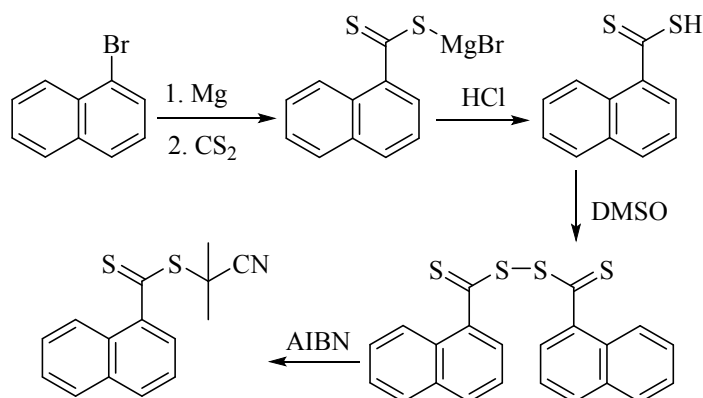

Scheme 2. Synthetic pathway of CPDN.

1. J. Zhu, X. L. Zhu, Z. P. Cheng, F. Liu and J. M. Lu, *Polymer*, **2002**, 43, 7037.
